# Supplementary material for: The Striking Flower-in-Flower Phenotype of Arabidopsis thaliana Nossen (No-0) is Caused by a Novel LEAFY Allele
Source: PubMed Central journal article supplement (PMC6963406; doi:10.3390/plants8120599), 2019-12-13
Supplement: plants-08-00599-s001.pdf [file plants-08-00599-s001.pdf]

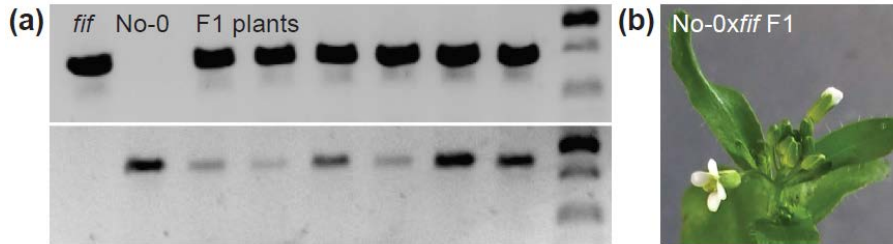

**Figure S1.** Proof of the successful backcross of the *fif* mutant with wild type No-0.

**(a)** Genotyping PCR analysis of F1 plant material using a primer pair (sense: 5'-CGTGAACTCAAGGCATTCTCTACTTC-3'; antisense: 5'-CGATTTTCGACTTTAACCCGACCGG-3') specifically amplifying the Ds transposon (upper row) and a primer pair (sense: see above; antisense: 5'-CGTACGTAGAACAACAGAGAATAAGC-3') specifically amplifying the wild-type genomic region (lower row). **(b)** Representative image of the inflorescence and flower phenotype of F1 plants generated by the cross of the *fif* mutant with wild type No-0 (♀No-0 x ♂*fif*). The reciprocal cross (♀*fif* x ♂No-0) provided identical results.

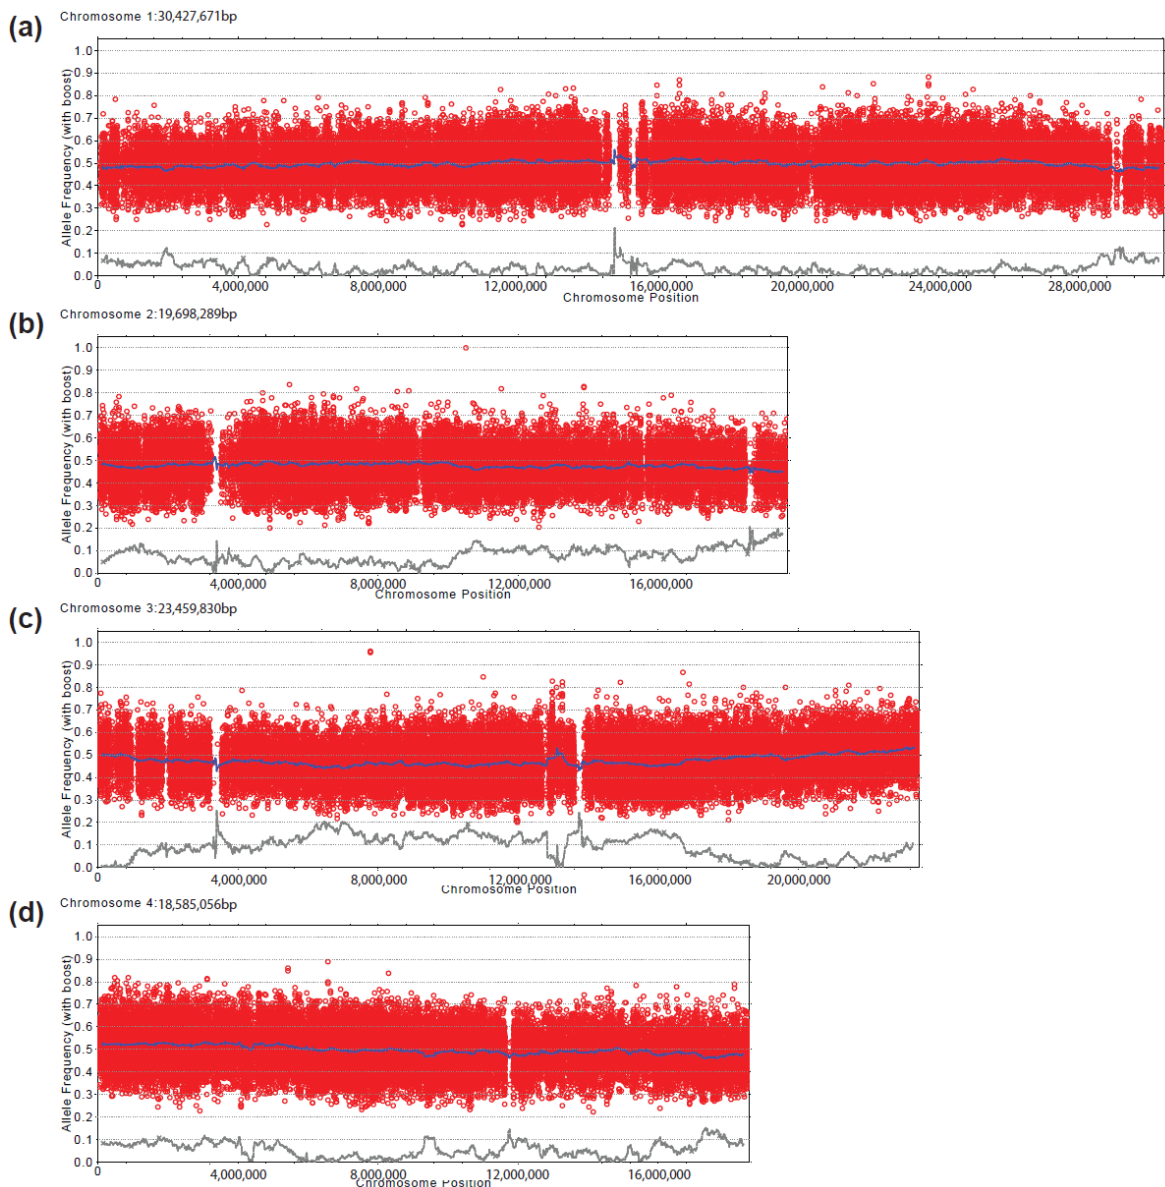

**Figure S2.** Allele frequency analysis of the No-0 allele within the recombinant mutant pool (unlinked chromosomes). Each red circle refers to a SNP marker distinguishing the No-0 and Col-0 genotypes. The blue line refers to a 200 kb sliding window analysis of the allele frequencies. The brown line would highlight potential mapping intervals (x-axis: genomic location; y-axis: No-0 allele frequency). **(a)** Chromosome 1. **(b)** Chromosome 2. **(c)** Chromosome 3. **(d)** Chromosome 4.

| Name       | Sequence                                                            | Marker Type | bp <i>Col-0</i> | bp <i>No-0</i> |        |
|------------|---------------------------------------------------------------------|-------------|-----------------|----------------|--------|
| 7_1-8660   | S GCGGCACAACCTAAATGAAA<br>A TGCATGCAATTATCACGTATG                   | INDEL       | 189             | 168            |        |
| 15_1-26627 | S GCAATTCATCAGCAGGAGGT<br>A ATCAGGGAGCAAAATGCAAG                    | INDEL       | 245             | 261            |        |
| 20_2-12717 | S AAAATGGGGCCTAATACGTTG<br>A CAAAGGAAACACCTGCATCA                   | INDEL       | 403             | ~180           |        |
| 4_3-3716   | S TAATGGTGGCCCAATCTCAT<br>A AATTCCAAATGGAGCCACAA                    | INDEL       | 1482            | 613            |        |
| 16_3-20726 | S GGGCCCATTTCAACTAAGGA<br>A TCTACAAGCCCAGTAAAACT                    | INDEL       | 149             | ~160           |        |
| 42_4-17544 | S CACCATTGACATTTGATGCAC<br>A CCGTAGCTCCATTGGCTTAT                   | INDEL       | 214             | 234            |        |
| 1_5-1576   | S CAGCTCCGACGATGATGATA<br>A TGGAGTAATTGTTCCCTTCACAAA                | INDEL       | 363             | ~420           |        |
| 37_5-22317 | S GCATTGAAATAGTGTTTTAACCAAA<br>A TGTTGGTTGCCACCTTATCA               | INDEL       | 132             | 152            |        |
| 19_5-17388 | S TTTTGCAAGTCCGTAGTCAATG<br>A TTTGGTTTTGGAATTTCTTTTG                | INDEL       | 110             | 121            |        |
| 35_5-19138 | S AACTCATGCAATGCGACATC<br>A CCCGTCCATGATCTGTTTCT                    | INDEL       | 182             | 164            |        |
| 37_5-22317 | S GCATTGAAATAGTGTTTTAACCAAA<br>A TGTTGGTTGCCACCTTATCA               | INDEL       | 132             | 152            |        |
| Enzyme     |                                                                     |             |                 |                |        |
| S5-16      | S CACGAGAGATACCTGCAAAACAG<br>A CAAACGCTTTTGAATCATGGGT <u>CC</u>     | dCAP        | Drall           | 160            | 134+26 |
| S5-24      | S GTAATACACAACAATGGGGAG<br>A CATATTCGAGTTCTGATGCACAC                | dCAP        | Esp3I           | 244+43+26      | 287+26 |
| 5-LFY      | S TATCTGTTCCACTTGTACGAAG <u>TAT</u><br>A CATAAATTTCAAGATAATGAACGGTC | dCAP        | AccI            | 150            | 129+21 |
| 5-LFY#2    | S TATCTGTTCCACTTGTACGAAG <u>G</u> CAT<br>A Same as 5-LFY            | dCAP        | SphI            | 129+21         | 150    |

**Table S1** Names and sequences of the INDEL and dCAP primers. Bold and underlined: introduced mismatches to incorporate an ecotype specific restriction site in the PCR product

| Name   |   |      | sequence                       |
|--------|---|------|--------------------------------|
| pAP1   | S | Bio- | aaaaaGAAGGACCAGTGGTCCGTACaaaa  |
|        | A |      | ttttGTACGGACCACTGGTCCTTCtttt   |
| pAP1m  | S | Bio- | aaaaaGAAGGAAAAGTAATCCGTACaaaa  |
|        | A |      | ttttGTACGGATTACTTTTCCTTCtttt   |
| C28M12 | S | Bio- | aaaaaaTTTATACTTGATCATaaCTTaaaa |
|        | A |      | ttttAAGttATGATCAAGTATAAAttttt  |

**Table S2** Sequences of the dsDNA oligonucleotides used in the DPI-ELISA.
